# Supplementary material for: Porous MOF-808@PVDF beads for removal of iodine from gas streams
Source: Royal Society of Chemistry journal article supplement (doi:10.1039/d0ra08741f), 2020-01-01
Supplement: d0ra08741f1.pdf [file d0ra08741f1.pdf]

Electronic Supplementary Information

## Porous MOF-808@ PVDF Beads for Removal of Iodine from Gas Streams

*Lingyu Wang,<sup>a</sup> Peng Chen,<sup>b</sup> Xiuting Dong,<sup>b</sup> Wen Zhang,<sup>b\*</sup> Song Zhao,<sup>b</sup> Songtao Xiao,<sup>a</sup> Yinggen Ouyang<sup>a\*</sup>*

<sup>a</sup>Department of Radiochemistry, China Institute of Atomic Energy, Beijing 102413, China

<sup>b</sup>State Key Laboratory of Chemical Engineering, Tianjin Key Laboratory of Membrane Science & Desalination Technology, and School of Chemical Engineering and Technology, Tianjin University, Tianjin 300350, China

\*To whom correspondence should be addressed. E-mail: zhang\_wen@tju.edu.cn.  
oyyg@ciae.ac.cn.

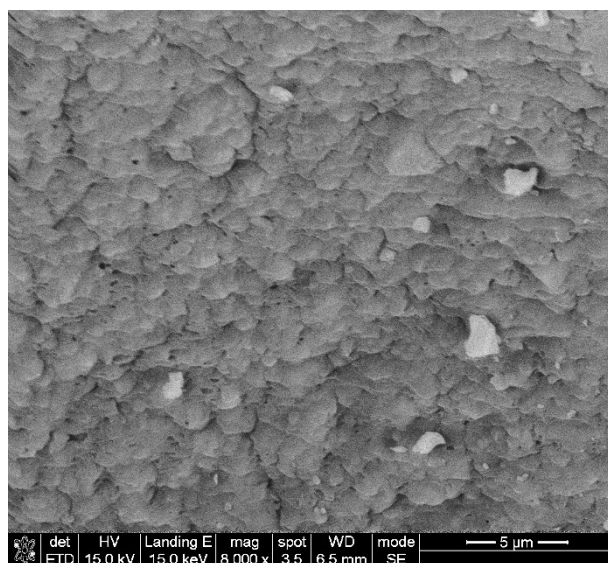

**Figure S1** SEM image for the outside surface of 808-PVDF0.7.

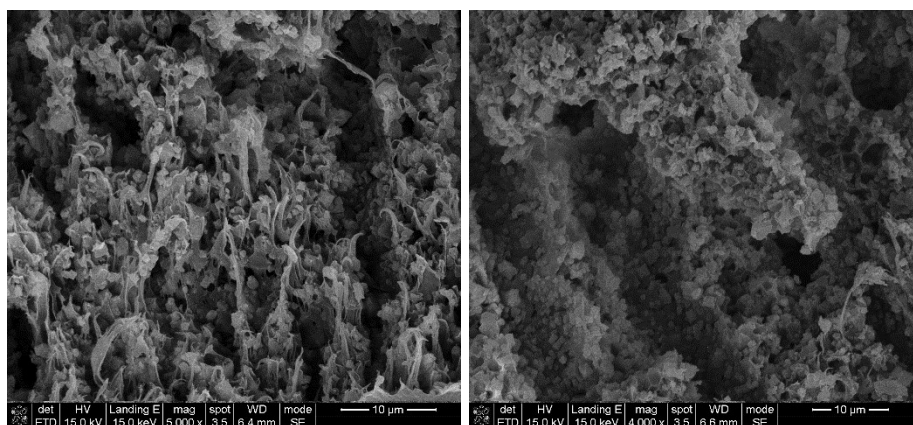

**Figure S2** SEM image for the inner texture of 808-PVDF0.7.

**Table S1** The contents of MOF-808 in 808-PVDF<sub>x</sub> beads

|             | F atomic % | Zr atomic % | MOF-808 wt.% |
|-------------|------------|-------------|--------------|
| 808-PVDF0.3 | 85.88      | 8.55        | 36%          |
| 808-PVDF0.5 | 72.27      | 15.82       | 55%          |
| 808-PVDF0.7 | 44.53      | 19.44       | 71%          |

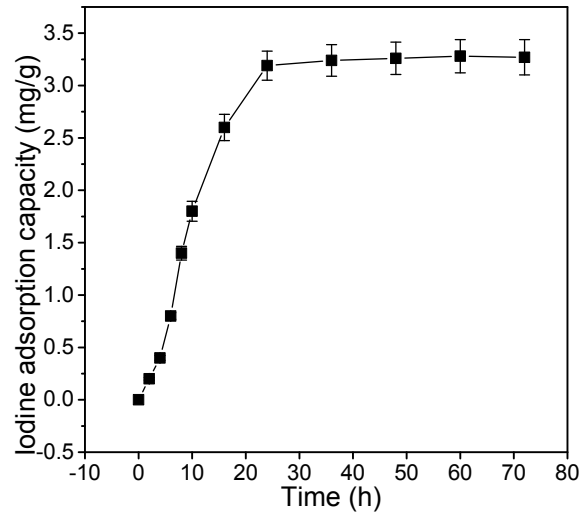

**Figure S3** Adsorption curves for PVDF beads at 80 °C.

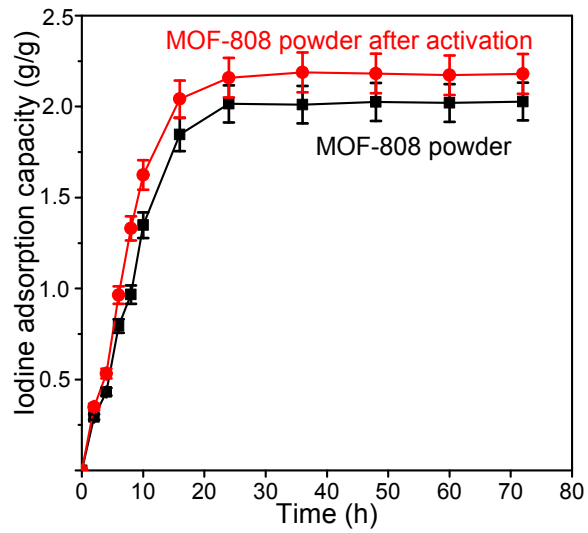

**Figure S4** Adsorption curves for MOF-808 powder before and after activation. (activated using 250 mL DMF/25 mL ethylene glycol at 130 °C for 24 h)
